# Supplementary material
Source: Springer Nature journal article supplement (https://www.springermedizin.de/resource/supplementary/12960_2013_364_MOESM6_ESM.pdf/9569952)
Supplement: MOESM6 [file 9569952]

## Work-Related

## Burnout Dimensions

## Well-Being and Coping

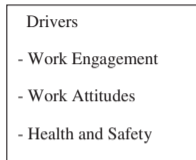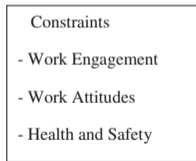

Work-Life/Home Conflict

```
graph LR; WLC[Work-Life/Home Conflict] ---| + | EE[Emotional Exhaustion];
```

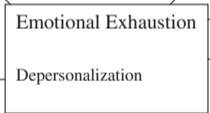

Contributors to Good Health

```
graph LR; EE[Emotional Exhaustion] ---| - | CGH[Contributors to Good Health];
```

Adaptive Coping

```
graph LR; EE[Emotional Exhaustion] ---| - | AC[Adaptive Coping];
```

Contributors to Poor Mental Health

```
graph LR; EE[Emotional Exhaustion] ---| + | CPMH[Contributors to Poor Mental Health];
```

Ineffective Coping

```
graph LR; EE[Emotional Exhaustion] ---| + | IC[Ineffective Coping];
```
